# Supplementary material for: Organo-functionalized metal–oxide clusters: synthesis and characterization of the reduced cationic species [NaVIV6O6{(OCH2CH2)2NH}6]+
Source: Royal Society of Chemistry journal article supplement (doi:10.1039/c4dt02174f), 2014-01-01
Supplement: c4dt02174f1.pdf [file c4dt02174f1.pdf]

Electronic Supplementary Information for:

# Organo-Functionalized Metal-Oxide Clusters: Synthesis and Characterization of the Reduced Cationic Species $[\text{NaV}^{\text{IV}}_6\text{O}_6\{(\text{OCH}_2\text{CH}_2)_2\text{NH}\}_6]^+$

M. Ishaque Khan,<sup>\*a</sup> Y. Zheng,<sup>a</sup> H. Li,<sup>a</sup> L. Swenson,<sup>a</sup> A. Basha,<sup>a</sup> and R. J. Doedens<sup>b</sup>

<sup>a</sup>Department of Biological and Chemical Sciences, Illinois Institute of Technology, Chicago, IL, 60616, USA

<sup>b</sup>Department of Chemistry, University of California, Irvine, CA, Irvine, 92697, USA

FTIR spectrum of  $\text{NaV}^{\text{IV}}_6\text{O}_6[(\text{OCH}_2\text{CH}_2)_2\text{NH}]_6 \cdot (\text{OH})_{0.5} \cdot \text{Cl}_{0.5} \cdot (\text{HOCH}_2\text{CH}_2)_2\text{N}(\text{CH}_2\text{CH}_2\text{NH}_2)$  (**C2**).

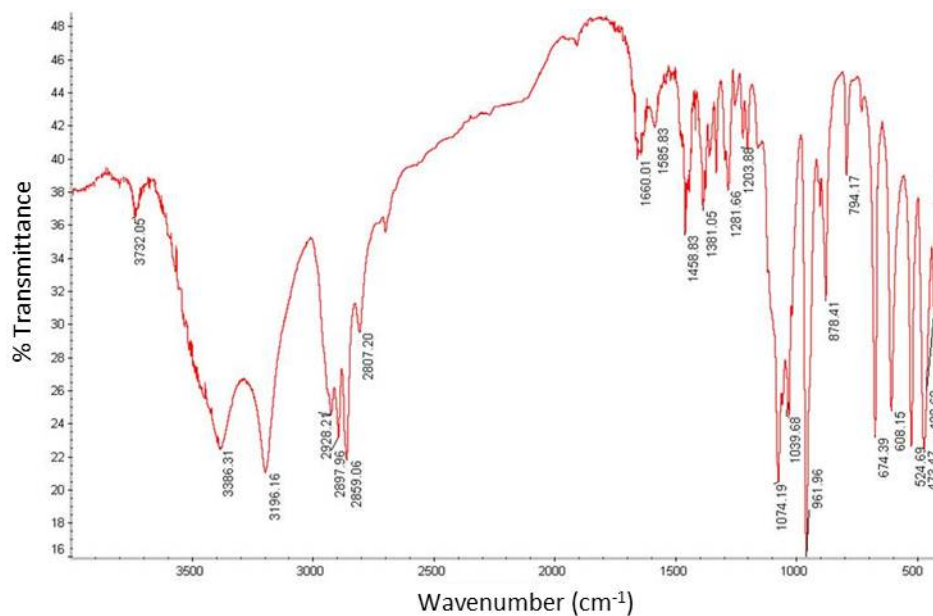

**Fig. S1** FTIR spectrum of  $\text{NaV}^{\text{IV}}_6\text{O}_6[(\text{OCH}_2\text{CH}_2)_2\text{NH}]_6 \cdot (\text{OH})_{0.5} \cdot \text{Cl}_{0.5} \cdot (\text{HOCH}_2\text{CH}_2)_2\text{N}(\text{CH}_2\text{CH}_2\text{NH}_2)$  (**C2**).

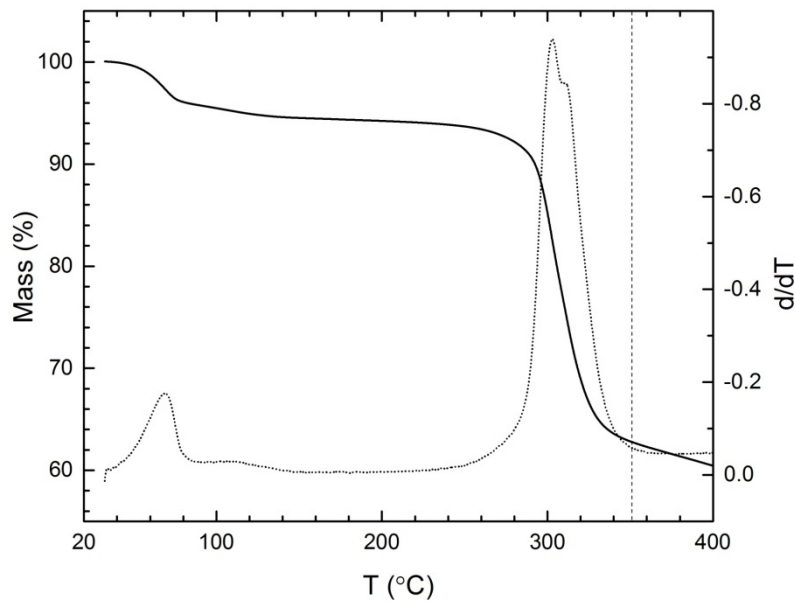

**Fig. S2** TGA curve of a polycrystalline (powder) sample of  $\text{NaV}_6\text{O}_6[(\text{OCH}_2\text{CH}_2)_2\text{NH}]_6 \cdot (\text{OH})_{0.5} \cdot \text{Cl}_{0.5} \cdot 3(\text{H}_2\text{O})$  (**C3**) and derivative of mass loss (.....). **C3** loses about 4.5 wt. % at 100 °C and an additional 1.2 wt. % by 200 °C, which we attribute to water of crystallization and strongly held water, respectively. The mass % loss from 200 to 351 °C (31.4 %) corresponds to the mass % of C and H associated with the functionalized cationic core of **C3**. (3°C/min, 100 SCCM Ar)

### **Cyclic Voltammetry—determination of the nature of the shoulder appearing in cyclic voltammogram of C3 (Fig. 2).**

The shoulder appearing in the cyclic voltammogram of **C3** (Fig. 3) may be conceivably caused by adsorption of the oxidized species. In such a case, the adsorption energy lowers the effective activation energy of the electrochemical oxidation process, resulting in a reduced oxidation potential for the fraction of **C3** that is oxidized *and* adsorbed as compared to the fraction of **C3** that is oxidized but not adsorbed. A shoulder (or “pre-peak”) appears in such a case.<sup>1</sup> Such adsorptive currents have a linear scan rate dependence,<sup>2</sup> while the current associated with the non-adsorptive case has a linear square root scan rate dependence due to mass-transport effects.<sup>3</sup> Therefore the origin of the shoulder is investigated by plotting the peak current ( $I_p$ ) associated with the shoulder versus the scan rate and square root of the scan rate. We found the best linear relationship and most ideal y-intercept value for the  $I_p$  versus square root case, indicating that the shoulder is not due to adsorption of the oxidized species. Peak currents were obtained from Gaussian curves fit to the background-subtracted data.

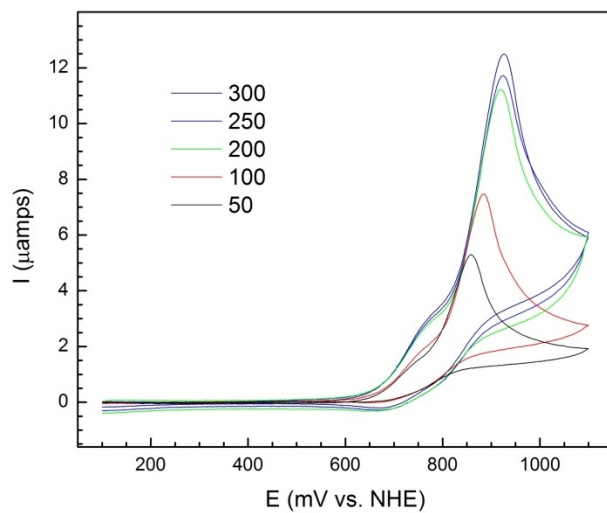

**Fig. S3** Background-subtracted cyclic voltammograms of C3 at the scan rates indicated in the figure.

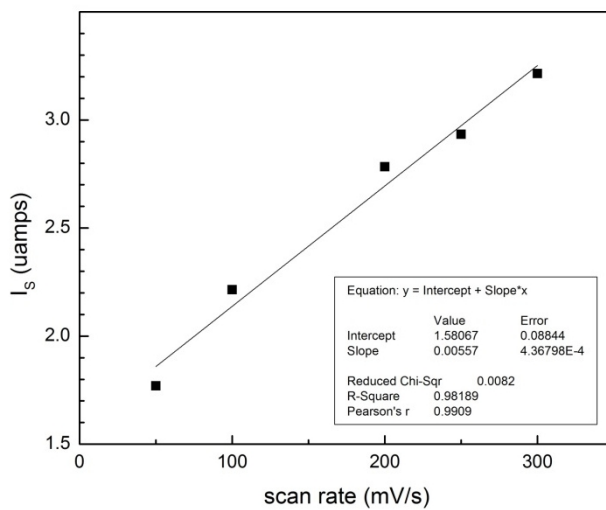

**Fig. S4** The shoulder currents ( $I_s$ ) of Fig. S3 versus the scan rate.

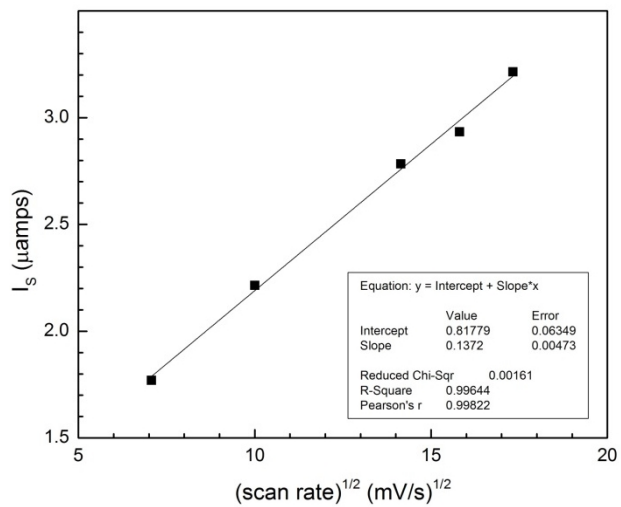

**Fig. S5** The shoulder currents ( $I_s$ ) of Fig. S3 versus the square root of the scan rate.

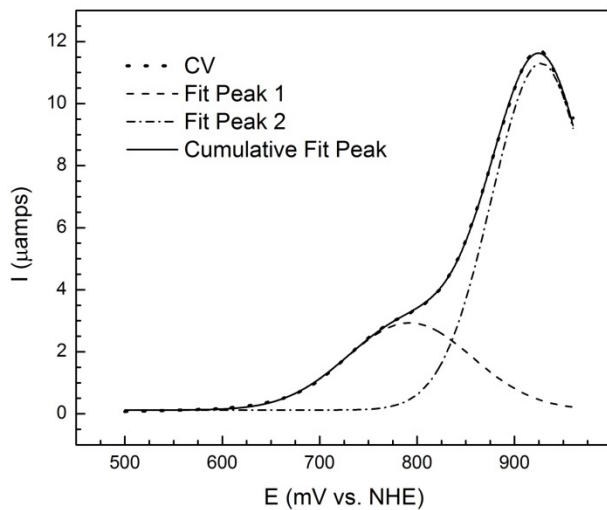

**Fig. S6** Sample peak fitting (scan rate = 250 mV/s). Gaussian peaks were fit to the portion of the background-subtracted anodic scan indicated in the figure in order to determine the peak current associated with the leading shoulder indicated in the scan rate dependent CVs (Fig. S3).

### Cyclic Voltammetry—C1/C3 oxidation potential comparison

In the general case, the peak position (mV) is a function of the intrinsic redox potential of the species, its distance from the electrode, and mass transport parameters (species diffusion coefficient). In the present case, we may assume that the intrinsic redox potentials of **C1** and **C3** are (nearly) equivalent, due to the isomorphous nature of the respective cationic cores of **C1** and **C3** with respect to the V=O<sub>t</sub> bond (Fig. 1). This assumption is supported by the strong correspondence of the main aqueous phase charge transfer band (V=O<sub>t</sub>) observed in the UV-vis spectra (Fig. 4). With respect to mass transport, the larger **C1**, with its six pendant ethanolic arms, is expected to have a lower diffusion coefficient than **C3**. All other things being equal, this factor would order the oxidative potentials as **C3** > **C1**.<sup>4</sup> Therefore we attribute the observed order (**C1** > **C3**) to an increase in charge transfer distance caused by the pendant ethanolic arms of **C1**.

1. Bard, A. *Electrochemical Methods: Fundamentals and Applications*, 2<sup>nd</sup> ed.; John Wiley & Sons: New York, 2001; pp. 595-601.
2. Ibid.
3. Ibid.
4. Ibid., pp. 234-236.

Table 1. Crystal data and structure refinement for **C3**.

|                                   |                                                                                                  |          |
|-----------------------------------|--------------------------------------------------------------------------------------------------|----------|
| Empirical formula                 | C <sub>16</sub> H <sub>36</sub> N <sub>4</sub> Na <sub>0.67</sub> O <sub>14</sub> V <sub>4</sub> |          |
| Formula weight                    | 727.57                                                                                           |          |
| Temperature                       | 88(2) K                                                                                          |          |
| Wavelength                        | 0.71073 Å                                                                                        |          |
| Crystal system                    | Cubic                                                                                            |          |
| Space group                       | P2 <sub>1</sub> 3 (#198)                                                                         |          |
| Unit cell dimensions              | a = 18.316(2) Å                                                                                  | α = 90°. |
|                                   | b = 18.316(2) Å                                                                                  | β = 90°. |
|                                   | c = 18.316(2) Å                                                                                  | γ = 90°. |
| Volume                            | 6144(2) Å <sup>3</sup>                                                                           |          |
| Z                                 | 6                                                                                                |          |
| Density (calculated)              | 1.180 Mg/m <sup>3</sup>                                                                          |          |
| Absorption coefficient            | 0.939 mm <sup>-1</sup>                                                                           |          |
| F(000)                            | 2228                                                                                             |          |
| Crystal size                      | 0.25 x 0.22 x 0.10 mm <sup>3</sup>                                                               |          |
| Theta range for data collection   | 1.93 to 28.27°.                                                                                  |          |
| Index ranges                      | -23 ≤ h ≤ 23, -24 ≤ k ≤ 24, -24 ≤ l ≤ 24                                                         |          |
| Reflections collected             | 74709                                                                                            |          |
| Independent reflections           | 5107 [R(int) = 0.0466]                                                                           |          |
| Completeness to theta = 28.27°    | 99.9 %                                                                                           |          |
| Absorption correction             | Semi-empirical from equivalents                                                                  |          |
| Max. and min. transmission        | 0.7457 and 0.6748                                                                                |          |
| Refinement method                 | Full-matrix least-squares on F <sup>2</sup>                                                      |          |
| Data / restraints / parameters    | 5107 / 1 / 179                                                                                   |          |
| Goodness-of-fit on F <sup>2</sup> | 1.125                                                                                            |          |
| Final R indices [I > 2σ(I)]       | R1 = 0.0439, wR2 = 0.1380                                                                        |          |
| R indices (all data)              | R1 = 0.0484, wR2 = 0.1408                                                                        |          |
| Absolute structure parameter      | -0.01(3)                                                                                         |          |
| Largest diff. peak and hole       | 0.685 and -0.353 e.Å <sup>-3</sup>                                                               |          |

Table 2. Atomic coordinates ( $\times 10^4$ ) and equivalent isotropic displacement parameters ( $\text{\AA}^2 \times 10^3$ ) for **C3**. U(eq) is defined as one third of the trace of the orthogonalized  $U^{ij}$  tensor.

|       | x        | y         | z        | U(eq) |
|-------|----------|-----------|----------|-------|
| V(1)  | 5008(1)  | 9683(1)   | 2345(1)  | 25(1) |
| V(2)  | 6526(1)  | 10497(1)  | 1835(1)  | 26(1) |
| Na(1) | 5922(1)  | 9078(1)   | 922(1)   | 24(1) |
| O(1)  | 5404(1)  | 8607(1)   | 1958(1)  | 26(1) |
| O(2)  | 5446(1)  | 10121(1)  | 1440(1)  | 26(1) |
| O(3)  | 4195(1)  | 9145(1)   | 1804(1)  | 29(1) |
| O(4)  | 5992(1)  | 9970(1)   | 2650(1)  | 30(1) |
| O(5)  | 4462(1)  | 10298(1)  | 2672(1)  | 34(1) |
| O(6)  | 7137(1)  | 10830(1)  | 2377(1)  | 33(1) |
| N(1)  | 5113(2)  | 9067(1)   | 3352(1)  | 31(1) |
| N(2)  | 5907(2)  | 11504(1)  | 1741(2)  | 32(1) |
| C(1)  | 5602(2)  | 9522(2)   | 3804(2)  | 35(1) |
| C(2)  | 6253(2)  | 9778(2)   | 3356(2)  | 31(1) |
| C(3)  | 5379(2)  | 8293(2)   | 3232(2)  | 35(1) |
| C(4)  | 5801(2)  | 8243(2)   | 2530(2)  | 31(1) |
| C(5)  | 5149(2)  | 11399(2)  | 1478(2)  | 34(1) |
| C(6)  | 5081(2)  | 10676(2)  | 1058(2)  | 31(1) |
| C(7)  | 6371(2)  | 11955(2)  | 1252(2)  | 40(1) |
| C(8)  | 3487(2)  | 9391(2)   | 1616(2)  | 37(1) |
| O(11) | 3737(5)  | 8971(5)   | 4235(5)  | 85(2) |
| O(12) | 3232(6)  | 11247(6)  | 2535(6)  | 85(2) |
| O(13) | 1864(12) | 11202(13) | 3296(13) | 85(2) |

Table 3. Bond lengths [ $\text{\AA}$ ] and angles [ $^\circ$ ] for **C3**.

---

|                |            |
|----------------|------------|
| V(1)-O(5)      | 1.621(2)   |
| V(1)-O(4)      | 1.958(2)   |
| V(1)-O(2)      | 2.008(2)   |
| V(1)-O(3)      | 2.043(2)   |
| V(1)-N(1)      | 2.170(3)   |
| V(1)-O(1)      | 2.216(2)   |
| V(1)-Na(1)     | 3.2894(5)  |
| V(2)-O(6)      | 1.616(2)   |
| V(2)-O(3)#1    | 1.949(2)   |
| V(2)-O(1)#1    | 2.003(2)   |
| V(2)-O(4)      | 2.028(2)   |
| V(2)-N(2)      | 2.170(3)   |
| V(2)-O(2)      | 2.216(2)   |
| V(2)-Na(1)     | 3.2829(5)  |
| Na(1)-O(1)     | 2.290(2)   |
| Na(1)-O(2)     | 2.304(2)   |
| O(1)-C(4)      | 1.438(4)   |
| O(1)-V(2)#2    | 2.003(2)   |
| O(2)-C(6)      | 1.402(4)   |
| O(3)-C(8)      | 1.416(4)   |
| O(3)-V(2)#2    | 1.949(2)   |
| O(4)-C(2)      | 1.424(4)   |
| N(1)-C(1)      | 1.478(4)   |
| N(1)-C(3)      | 1.514(4)   |
| N(2)-C(5)      | 1.483(4)   |
| N(2)-C(7)      | 1.485(4)   |
| C(1)-C(2)      | 1.521(5)   |
| C(3)-C(4)      | 1.504(4)   |
| C(5)-C(6)      | 1.536(4)   |
| C(7)-C(8)#1    | 1.498(5)   |
| C(8)-C(7)#2    | 1.498(5)   |
| O(5)-V(1)-O(4) | 106.03(11) |
| O(5)-V(1)-O(2) | 105.86(11) |



|                    |            |
|--------------------|------------|
| O(4)-V(1)-O(2)     | 76.19(9)   |
| O(5)-V(1)-O(3)     | 93.69(11)  |
| O(4)-V(1)-O(3)     | 159.85(9)  |
| O(2)-V(1)-O(3)     | 94.79(9)   |
| O(5)-V(1)-N(1)     | 95.86(11)  |
| O(4)-V(1)-N(1)     | 79.40(10)  |
| O(2)-V(1)-N(1)     | 150.92(10) |
| O(3)-V(1)-N(1)     | 103.01(10) |
| O(5)-V(1)-O(1)     | 159.71(10) |
| O(4)-V(1)-O(1)     | 91.62(9)   |
| O(2)-V(1)-O(1)     | 87.76(8)   |
| O(3)-V(1)-O(1)     | 69.79(8)   |
| N(1)-V(1)-O(1)     | 77.29(9)   |
| O(5)-V(1)-Na(1)    | 147.19(10) |
| O(4)-V(1)-Na(1)    | 81.27(7)   |
| O(2)-V(1)-Na(1)    | 43.75(6)   |
| O(3)-V(1)-Na(1)    | 79.87(6)   |
| N(1)-V(1)-Na(1)    | 116.95(8)  |
| O(1)-V(1)-Na(1)    | 44.01(6)   |
| O(6)-V(2)-O(3)#1   | 106.01(11) |
| O(6)-V(2)-O(1)#1   | 106.57(11) |
| O(3)#1-V(2)-O(1)#1 | 76.26(9)   |
| O(6)-V(2)-O(4)     | 93.47(10)  |
| O(3)#1-V(2)-O(4)   | 160.26(9)  |
| O(1)#1-V(2)-O(4)   | 95.45(9)   |
| O(6)-V(2)-N(2)     | 95.20(12)  |
| O(3)#1-V(2)-N(2)   | 79.51(10)  |
| O(1)#1-V(2)-N(2)   | 151.00(10) |
| O(4)-V(2)-N(2)     | 102.23(10) |
| O(6)-V(2)-O(2)     | 159.45(10) |
| O(3)#1-V(2)-O(2)   | 91.31(9)   |
| O(1)#1-V(2)-O(2)   | 87.97(8)   |
| O(4)-V(2)-O(2)     | 70.28(8)   |
| N(2)-V(2)-O(2)     | 76.83(9)   |
| O(6)-V(2)-Na(1)    | 147.67(10) |
| O(3)#1-V(2)-Na(1)  | 81.25(7)   |

|                   |            |
|-------------------|------------|
| O(1)#1-V(2)-Na(1) | 43.48(6)   |
| O(4)-V(2)-Na(1)   | 80.53(7)   |
| N(2)-V(2)-Na(1)   | 117.13(8)  |
| O(2)-V(2)-Na(1)   | 44.50(6)   |
| O(1)-Na(1)-O(1)#1 | 100.74(9)  |
| O(1)-Na(1)-O(2)#1 | 179.86(14) |
| O(1)-Na(1)-O(2)   | 79.31(7)   |
| O(2)#1-Na(1)-O(2) | 100.57(9)  |
| O(1)-Na(1)-V(2)#1 | 137.73(8)  |
| O(2)-Na(1)-V(2)#1 | 142.95(8)  |
| O(1)-Na(1)-V(2)   | 90.87(6)   |
| O(1)#1-Na(1)-V(2) | 37.00(5)   |
| O(2)#1-Na(1)-V(2) | 89.09(5)   |
| O(2)-Na(1)-V(2)   | 42.38(5)   |
| V(2)#1-Na(1)-V(2) | 119.901(4) |
| O(1)-Na(1)-V(1)   | 42.24(5)   |
| O(1)#1-Na(1)-V(1) | 89.06(5)   |
| O(2)#1-Na(1)-V(1) | 137.64(7)  |
| O(2)-Na(1)-V(1)   | 37.07(5)   |
| V(2)-Na(1)-V(1)   | 60.059(13) |
| V(2)-Na(1)-V(1)#2 | 179.92(9)  |
| O(1)-Na(1)-V(1)#1 | 142.98(8)  |
| O(2)-Na(1)-V(1)#1 | 90.97(6)   |
| V(2)-Na(1)-V(1)#1 | 60.132(13) |
| V(1)-Na(1)-V(1)#1 | 119.908(4) |
| C(4)-O(1)-V(2)#2  | 121.11(18) |
| C(4)-O(1)-V(1)    | 110.17(17) |
| V(2)#2-O(1)-V(1)  | 102.47(9)  |
| C(4)-O(1)-Na(1)   | 124.72(18) |
| V(2)#2-O(1)-Na(1) | 99.52(9)   |
| V(1)-O(1)-Na(1)   | 93.75(8)   |
| C(6)-O(2)-V(1)    | 120.74(19) |
| C(6)-O(2)-V(2)    | 111.24(17) |
| V(1)-O(2)-V(2)    | 102.14(9)  |
| C(6)-O(2)-Na(1)   | 125.16(18) |
| V(1)-O(2)-Na(1)   | 99.18(9)   |

|                  |            |
|------------------|------------|
| V(2)-O(2)-Na(1)  | 93.12(8)   |
| C(8)-O(3)-V(2)#2 | 119.62(19) |
| C(8)-O(3)-V(1)   | 129.24(19) |
| V(2)#2-O(3)-V(1) | 111.13(11) |
| C(2)-O(4)-V(1)   | 120.12(18) |
| C(2)-O(4)-V(2)   | 128.67(19) |
| V(1)-O(4)-V(2)   | 111.16(10) |
| C(1)-N(1)-C(3)   | 114.4(3)   |
| C(1)-N(1)-V(1)   | 103.7(2)   |
| C(3)-N(1)-V(1)   | 113.11(19) |
| C(5)-N(2)-C(7)   | 114.3(3)   |
| C(5)-N(2)-V(2)   | 113.89(19) |
| C(7)-N(2)-V(2)   | 102.8(2)   |
| N(1)-C(1)-C(2)   | 110.3(2)   |
| O(4)-C(2)-C(1)   | 107.6(3)   |
| C(4)-C(3)-N(1)   | 110.2(3)   |
| O(1)-C(4)-C(3)   | 109.6(3)   |
| N(2)-C(5)-C(6)   | 110.4(3)   |
| O(2)-C(6)-C(5)   | 109.7(3)   |
| N(2)-C(7)-C(8)#1 | 110.2(3)   |
| O(3)-C(8)-C(7)#2 | 108.5(3)   |

---

Symmetry transformations used to generate equivalent atoms:

#1  $z+1/2, -x+3/2, -y+1$  #2  $-y+3/2, -z+1, x-1/2$

Table 4. Anisotropic displacement parameters ( $\text{\AA}^2 \times 10^3$ ) for **C3**. The anisotropic displacement factor exponent takes the form:  $-2\pi^2 [ h^2 a^{*2} U_{11} + \dots + 2 h k a^* b^* U_{12} ]$

|       | U11   | U22   | U33   | U23    | U13   | U12   |
|-------|-------|-------|-------|--------|-------|-------|
| V(1)  | 26(1) | 25(1) | 25(1) | -3(1)  | 3(1)  | -2(1) |
| V(2)  | 26(1) | 27(1) | 24(1) | -5(1)  | 1(1)  | -5(1) |
| Na(1) | 24(1) | 24(1) | 24(1) | -2(1)  | 2(1)  | -2(1) |
| O(1)  | 27(1) | 28(1) | 23(1) | -1(1)  | 2(1)  | -2(1) |
| O(2)  | 28(1) | 23(1) | 27(1) | -2(1)  | 1(1)  | 0(1)  |
| O(3)  | 26(1) | 26(1) | 35(1) | -4(1)  | 4(1)  | -1(1) |
| O(4)  | 32(1) | 35(1) | 22(1) | 1(1)   | -1(1) | -7(1) |
| O(5)  | 33(1) | 29(1) | 39(1) | -5(1)  | 8(1)  | -2(1) |
| O(6)  | 31(1) | 38(1) | 31(1) | -7(1)  | 0(1)  | -8(1) |
| N(1)  | 35(1) | 32(1) | 27(1) | -2(1)  | 5(1)  | -3(1) |
| N(2)  | 38(1) | 23(1) | 35(1) | -7(1)  | 2(1)  | -4(1) |
| C(1)  | 41(2) | 37(2) | 27(2) | -5(1)  | 4(1)  | -5(2) |
| C(2)  | 36(2) | 38(2) | 20(1) | -3(1)  | -3(1) | -5(1) |
| C(3)  | 53(2) | 28(2) | 25(2) | -2(1)  | -2(1) | -6(1) |
| C(4)  | 33(2) | 29(1) | 30(2) | -3(1)  | -3(1) | 2(1)  |
| C(5)  | 38(2) | 23(1) | 41(2) | -1(1)  | 3(1)  | 4(1)  |
| C(6)  | 34(2) | 25(1) | 35(2) | 0(1)   | -3(1) | 0(1)  |
| C(7)  | 47(2) | 26(2) | 47(2) | -4(1)  | 14(2) | -3(1) |
| C(8)  | 23(1) | 38(2) | 50(2) | -10(2) | 4(1)  | -1(1) |

Table 5. Hydrogen coordinates ( $\times 10^4$ ) and isotropic displacement parameters ( $\text{\AA}^2 \times 10^3$ ) for **C3**.

|       | x    | y     | z    | U(eq) |
|-------|------|-------|------|-------|
| H(1)  | 4678 | 9048  | 3567 | 37    |
| H(2)  | 5891 | 11716 | 2177 | 38    |
| H(1A) | 5776 | 9235  | 4228 | 42    |
| H(1B) | 5330 | 9950  | 3990 | 42    |
| H(2A) | 6484 | 10206 | 3592 | 37    |
| H(2B) | 6621 | 9384  | 3319 | 37    |
| H(3A) | 5695 | 8145  | 3645 | 42    |
| H(3B) | 4956 | 7957  | 3214 | 42    |
| H(4A) | 6286 | 8474  | 2591 | 37    |
| H(4B) | 5875 | 7724  | 2398 | 37    |
| H(5A) | 5011 | 11809 | 1154 | 41    |
| H(5B) | 4810 | 11396 | 1899 | 41    |
| H(6A) | 4560 | 10546 | 1001 | 38    |
| H(6B) | 5297 | 10730 | 566  | 38    |
| H(7A) | 6802 | 12133 | 1525 | 48    |
| H(7B) | 6091 | 12384 | 1081 | 48    |
| H(8A) | 3518 | 9756  | 1219 | 45    |
| H(8B) | 3252 | 9624  | 2043 | 45    |
